# Supplementary material
Source: PubMed Central journal article supplement (PMC1458683)
Supplement: pnas_0600938103_1.pdf [file pnas_0600938103_1.pdf]

**Table 3. General features of *E. coli* genomes**

| <b>Genome</b> | <b>Chromosome size, bp</b> | <b>GC, %</b> | <b>No. of proteins in predicted proteome</b> | <b>tRNA genes</b> | <b>rRNA genes</b> | <b>Reference</b> |
|---------------|----------------------------|--------------|----------------------------------------------|-------------------|-------------------|------------------|
| K12           | 4,639,675                  | 50.8         | 4,237                                        | 86                | 22                | 3                |
| EDL933        | 5,521,804                  | 50.4         | 5,324                                        | 98                | 22                | 5                |
| SAKAI         | 5,498,450                  | 50.5         | 5,253                                        | 105               | 22                | 6                |
| CFT073        | 5,231,148                  | 50.5         | 5,379                                        | 89                | 21                | 4                |
| UTI89         | 5,065,741                  | 50.6         | 5,077                                        | 88                | 22                | This study       |
| Sf 2457T      | 4,599,326                  | 50.9         | 4,068                                        | 98                | 22                | 7                |
| Sf 301        | 4,607,197                  | 50.9         | 4,182                                        | 96                | 22                | 8                |

Reference numbers refer to the bibliography in the main text.
