# Supplementary material
Source: PubMed Central journal article supplement (PMC1458683)
Supplement: pnas_0600938103_2.pdf [file pnas_0600938103_2.pdf]

**Table 4. Site of isolation of strains used to resequence *amiA*, *fepE*, *ompC*, *adk*, *icd*, and *mdh***

| Allele          | No. strains | Urine | Periurethral | Fecal | Genome sequences | GenBank accession no.                                                                                                                                                              |
|-----------------|-------------|-------|--------------|-------|------------------|------------------------------------------------------------------------------------------------------------------------------------------------------------------------------------|
| <i>amiA</i> _1  | 0           | 0     | 0            | 0     | EDL933           | DQ389000                                                                                                                                                                           |
| <i>amiA</i> _2  | 0           | 0     | 0            | 0     | SAKAI            | DQ389001                                                                                                                                                                           |
| <i>amiA</i> _3  | 1           | 1     | 0            | 0     | -                | DQ389002                                                                                                                                                                           |
|                 |             |       |              |       |                  | DQ389003,<br>DQ441119,<br>DQ441120,<br>DQ441121,<br>DQ441122,                                                                                                                      |
| <i>amiA</i> _4  | 5           | 3     | 0            | 2     | K12              | DQ441123                                                                                                                                                                           |
| <i>amiA</i> _5  | 2           | 1     | 1            | 0     | -                | DQ389004,<br>DQ441124                                                                                                                                                              |
|                 |             |       |              |       |                  | DQ389005,<br>DQ441125,<br>DQ441126,                                                                                                                                                |
| <i>amiA</i> _6  | 4           | 4     | 0            | 0     | -                | DQ441127                                                                                                                                                                           |
|                 |             |       |              |       |                  | DQ389006,<br>DQ441128,                                                                                                                                                             |
| <i>amiA</i> _7  | 1           | 0     | 0            | 1     | Shigella 2T, 301 | DQ441129                                                                                                                                                                           |
|                 |             |       |              |       |                  | DQ389007,<br>DQ441130,<br>DQ441131,<br>DQ441132,<br>DQ441133,<br>DQ441134,<br>DQ441135,<br>DQ441136,<br>DQ441137,<br>DQ441138,<br>DQ441139,<br>DQ441140,<br>DQ441141,              |
| <i>amiA</i> _8  | 13          | 11    | 2            | 0     | CFT073           | DQ441142                                                                                                                                                                           |
|                 |             |       |              |       |                  | DQ389008,<br>DQ441143,<br>DQ441144,<br>DQ441145,<br>DQ441146,<br>DQ441147,<br>DQ441148,<br>DQ441149,<br>DQ441150,<br>DQ441151,<br>DQ441152,<br>DQ441153,<br>DQ441154,<br>DQ441155, |
| <i>amiA</i> _9  | 14          | 12    | 1            | 1     | UTI89            | DQ441156                                                                                                                                                                           |
| <i>amiA</i> _10 | 7           | 5     | 2            | 0     | -                | DQ389009,<br>DQ441157,                                                                                                                                                             |

|                |           |    |   |   |               |                                                                                                                                                                                                                                                    |
|----------------|-----------|----|---|---|---------------|----------------------------------------------------------------------------------------------------------------------------------------------------------------------------------------------------------------------------------------------------|
| <b>amiA_11</b> | <b>3</b>  | 2  | 1 | 0 | -             | DQ441158,<br>DQ441159,<br>DQ441160,<br>DQ441161,<br>DQ441162<br>DQ389010,<br>DQ441163,<br>DQ441164                                                                                                                                                 |
| <b>fepE_1</b>  | <b>0</b>  | 0  | 0 | 0 | K12           | DQ389058<br>DQ389059,<br>DQ441165,<br>DQ441166                                                                                                                                                                                                     |
| <b>fepE_2</b>  | <b>3</b>  | 2  | 1 | 0 | -             | DQ389060,<br>DQ441167                                                                                                                                                                                                                              |
| <b>fepE_3</b>  | <b>0</b>  | 0  | 0 | 0 | EDL933, SAKAI | DQ389061,<br>DQ441168,<br>DQ441169,<br>DQ441170,<br>DQ441171,<br>DQ441172,<br>DQ441173,<br>DQ441174,<br>DQ441175,<br>DQ441176,<br>DQ441177,<br>DQ441178,<br>DQ441179,<br>DQ441180,<br>DQ441181,<br>DQ441182,<br>DQ441183,<br>DQ441184,<br>DQ441185 |
| <b>fepE_4</b>  | <b>19</b> | 15 | 4 | 0 | -             | DQ389062,<br>DQ441186,<br>DQ441187,<br>DQ441188,<br>DQ441189,<br>DQ441190,<br>DQ441191,<br>DQ441192,<br>DQ441193,<br>DQ441194,<br>DQ441195,<br>DQ441196,<br>DQ441197,<br>DQ441198,<br>DQ441199                                                     |
| <b>fepE_5</b>  | <b>14</b> | 12 | 1 | 1 | UT189         | DQ389063,<br>DQ441200,<br>DQ441201,<br>DQ441202,<br>DQ441203                                                                                                                                                                                       |
| <b>fepE_6</b>  | <b>5</b>  | 3  | 0 | 2 | -             | DQ389064,<br>DQ441204,                                                                                                                                                                                                                             |
| <b>fepE_7</b>  | <b>3</b>  | 1  | 1 | 1 | -             |                                                                                                                                                                                                                                                    |

|                |           |           |          |          |                  |           |
|----------------|-----------|-----------|----------|----------|------------------|-----------|
|                |           |           |          |          |                  | DQ441205  |
| <b>fepE_8</b>  | <b>1</b>  | <b>1</b>  | <b>0</b> | <b>0</b> | -                | DQ389065  |
| <b>fepE_9</b>  | <b>0</b>  | <b>0</b>  | <b>0</b> | <b>0</b> | CFT073           | DQ389066  |
| <b>fepE_10</b> | <b>1</b>  | <b>1</b>  | <b>0</b> | <b>0</b> | -                | DQ389067  |
|                |           |           |          |          |                  | DQ389068, |
|                |           |           |          |          |                  | DQ441206, |
| <b>fepE_11</b> | <b>4</b>  | <b>4</b>  | <b>0</b> | <b>0</b> | -                | DQ441207, |
|                |           |           |          |          |                  | DQ441208  |
|                |           |           |          |          |                  | DQ389011, |
|                |           |           |          |          |                  | DQ441209, |
|                |           |           |          |          |                  | DQ441210, |
|                |           |           |          |          |                  | DQ441211, |
|                |           |           |          |          |                  | DQ441212, |
|                |           |           |          |          |                  | DQ441213, |
|                |           |           |          |          |                  | DQ441214, |
|                |           |           |          |          |                  | DQ441215, |
|                |           |           |          |          |                  | DQ441216, |
|                |           |           |          |          |                  | DQ441217, |
|                |           |           |          |          |                  | DQ441218, |
|                |           |           |          |          |                  | DQ441219, |
|                |           |           |          |          |                  | DQ441220, |
|                |           |           |          |          |                  | DQ441221, |
|                |           |           |          |          |                  | DQ441222, |
|                |           |           |          |          |                  | DQ441223, |
|                |           |           |          |          |                  | DQ441224, |
| <b>ompC_1</b>  | <b>17</b> | <b>15</b> | <b>1</b> | <b>1</b> | UTI89            | DQ441225  |
|                |           |           |          |          |                  | DQ389012, |
|                |           |           |          |          |                  | DQ441226, |
|                |           |           |          |          |                  | DQ441227, |
|                |           |           |          |          |                  | DQ441228, |
| <b>ompC_2</b>  | <b>4</b>  | <b>3</b>  | <b>1</b> | <b>0</b> | CFT073           | DQ441229  |
| <b>ompC_3</b>  | <b>1</b>  | <b>1</b>  | <b>0</b> | <b>0</b> | -                | DQ389013  |
|                |           |           |          |          |                  | DQ389014, |
| <b>ompC_4</b>  | <b>2</b>  | <b>1</b>  | <b>1</b> | <b>0</b> | -                | DQ441230  |
|                |           |           |          |          |                  | DQ389015, |
| <b>ompC_5</b>  | <b>0</b>  | <b>0</b>  | <b>0</b> | <b>0</b> | EDL933, SAKAI    | DQ441231  |
|                |           |           |          |          |                  | DQ389016, |
|                |           |           |          |          |                  | DQ441232, |
|                |           |           |          |          |                  | DQ441233, |
| <b>ompC_6</b>  | <b>4</b>  | <b>1</b>  | <b>1</b> | <b>2</b> | -                | DQ441234  |
| <b>ompC_7</b>  | <b>1</b>  | <b>1</b>  | <b>0</b> | <b>0</b> | -                | DQ389017  |
|                |           |           |          |          |                  | DQ389018, |
| <b>ompC_8</b>  | <b>0</b>  | <b>0</b>  | <b>0</b> | <b>0</b> | Shigella 2T, 301 | DQ441235  |
| <b>ompC_9</b>  | <b>1</b>  | <b>1</b>  | <b>0</b> | <b>0</b> | -                | DQ389019  |
|                |           |           |          |          |                  | DQ389020, |
|                |           |           |          |          |                  | DQ441236, |
|                |           |           |          |          |                  | DQ441237, |
|                |           |           |          |          |                  | DQ441238, |
|                |           |           |          |          |                  | DQ441239, |
|                |           |           |          |          |                  | DQ441240, |
|                |           |           |          |          |                  | DQ441241, |
|                |           |           |          |          |                  | DQ441242, |
|                |           |           |          |          |                  | DQ441243, |
| <b>ompC_10</b> | <b>13</b> | <b>11</b> | <b>2</b> | <b>0</b> | -                | DQ441244, |

|         |    |    |   |   |               |                                                                                                                                                                                                                                                                                                                                  |
|---------|----|----|---|---|---------------|----------------------------------------------------------------------------------------------------------------------------------------------------------------------------------------------------------------------------------------------------------------------------------------------------------------------------------|
|         |    |    |   |   |               | DQ441245,<br>DQ441246,<br>DQ441247<br>DQ389021,<br>DQ441248                                                                                                                                                                                                                                                                      |
| ompC_11 | 2  | 1  | 0 | 1 | -             | DQ389022                                                                                                                                                                                                                                                                                                                         |
| ompC_12 | 0  | 0  | 0 | 0 | K12           | DQ389023                                                                                                                                                                                                                                                                                                                         |
| ompC_13 | 1  | 1  | 0 | 0 | -             | DQ389024                                                                                                                                                                                                                                                                                                                         |
| ompC_14 | 1  | 1  | 0 | 0 | -             | DQ389025,<br>DQ441249,<br>DQ441250                                                                                                                                                                                                                                                                                               |
| ompC_15 | 3  | 2  | 1 | 0 | -             | DQ389026,<br>DQ441069,<br>DQ441070,<br>DQ441071,<br>DQ441072,<br>DQ441073,<br>DQ441074,<br>DQ441075,<br>DQ441076,<br>DQ441077,<br>DQ441078,<br>DQ441079,<br>DQ441080,<br>DQ441081,<br>DQ441082,<br>DQ441083,<br>DQ441084,<br>DQ441085,<br>DQ441086,<br>DQ441087,<br>DQ441088,<br>DQ441089,<br>DQ441090,<br>DQ441091,<br>DQ441092 |
| adk_1   | 25 | 21 | 4 | 0 | -             | DQ389027                                                                                                                                                                                                                                                                                                                         |
| adk_2   | 1  | 0  | 0 | 1 | -             | DQ389028,<br>DQ441093,<br>DQ441094,<br>DQ441095                                                                                                                                                                                                                                                                                  |
| adk_3   | 3  | 2  | 1 | 0 | CFT073        | DQ389029                                                                                                                                                                                                                                                                                                                         |
| adk_4   | 0  | 0  | 0 | 0 | K12           | DQ389030,<br>DQ441096                                                                                                                                                                                                                                                                                                            |
| adk_5   | 0  | 0  | 0 | 0 | EDL933, SAKAI | DQ389031,<br>DQ441097,<br>DQ441098,<br>DQ441099,<br>DQ441100,<br>DQ441101,<br>DQ441102,<br>DQ441103,<br>DQ441104,<br>DQ441105,                                                                                                                                                                                                   |
| adk_6   | 14 | 12 | 1 | 1 | UTI89         |                                                                                                                                                                                                                                                                                                                                  |

|              |           |           |          |          |                  |                                                                                                                                                                                   |
|--------------|-----------|-----------|----------|----------|------------------|-----------------------------------------------------------------------------------------------------------------------------------------------------------------------------------|
|              |           |           |          |          |                  | DQ441106,<br>DQ441107,<br>DQ441108,<br>DQ441109,<br>DQ441110<br>DQ389032,<br>DQ441111,<br>DQ441112,<br>DQ441113,<br>DQ441114,<br>DQ441115,<br>DQ441116,<br>DQ441117,<br>DQ441118  |
| <b>adk_7</b> | <b>7</b>  | <b>4</b>  | <b>1</b> | <b>2</b> | Shigella 2T, 301 |                                                                                                                                                                                   |
| <b>icd_1</b> | <b>0</b>  | <b>0</b>  | <b>0</b> | <b>0</b> | EDL933, SAKAI    | DQ389033,<br>DQ441027<br>DQ389034,<br>DQ441028                                                                                                                                    |
| <b>icd_2</b> | <b>2</b>  | <b>1</b>  | <b>1</b> | <b>0</b> | -                | DQ389035,<br>DQ441029,<br>DQ441030,<br>DQ441031,<br>DQ441032,<br>DQ441033,<br>DQ441034,<br>DQ441035,<br>DQ441036,<br>DQ441037,<br>DQ441038,<br>DQ441039,<br>DQ441040,<br>DQ441041 |
| <b>icd_3</b> | <b>13</b> | <b>12</b> | <b>1</b> | <b>0</b> | UTI89            | DQ441041                                                                                                                                                                          |
| <b>icd_4</b> | <b>1</b>  | <b>0</b>  | <b>0</b> | <b>1</b> | -                | DQ389036<br>DQ389037,<br>DQ441042,<br>DQ441043                                                                                                                                    |
| <b>icd_5</b> | <b>3</b>  | <b>2</b>  | <b>1</b> | <b>0</b> | -                | DQ389038,<br>DQ441044                                                                                                                                                             |
| <b>icd_6</b> | <b>0</b>  | <b>0</b>  | <b>0</b> | <b>0</b> | Shigella 2T, 301 | DQ389039,<br>DQ441045,<br>DQ441046,<br>DQ441047,<br>DQ441048,<br>DQ441049,<br>DQ441050,<br>DQ441051,<br>DQ441052,<br>DQ441053,<br>DQ441054,<br>DQ441055                           |
| <b>icd_7</b> | <b>12</b> | <b>10</b> | <b>2</b> | <b>0</b> | -                | DQ389040                                                                                                                                                                          |
| <b>icd_8</b> | <b>0</b>  | <b>0</b>  | <b>0</b> | <b>0</b> | K12              | DQ389041,<br>DQ441056,<br>DQ441057,<br>DQ441058,                                                                                                                                  |
| <b>icd_9</b> | <b>9</b>  | <b>8</b>  | <b>1</b> | <b>0</b> | -                |                                                                                                                                                                                   |

|        |    |    |   |   |                  |                                                                                                                                                                                                             |
|--------|----|----|---|---|------------------|-------------------------------------------------------------------------------------------------------------------------------------------------------------------------------------------------------------|
|        |    |    |   |   |                  | DQ441059,<br>DQ441060,<br>DQ441061,<br>DQ441062,<br>DQ441063                                                                                                                                                |
| icd_10 | 1  | 0  | 0 | 1 | -                | DQ389042                                                                                                                                                                                                    |
|        |    |    |   |   |                  | DQ389043,<br>DQ441064,<br>DQ441065                                                                                                                                                                          |
| icd_11 | 3  | 2  | 1 | 0 | -                | DQ389044                                                                                                                                                                                                    |
| icd_12 | 1  | 1  | 0 | 0 | -                | DQ389045,<br>DQ441066                                                                                                                                                                                       |
| icd_13 | 2  | 2  | 0 | 0 | -                | DQ389046                                                                                                                                                                                                    |
| icd_14 | 0  | 0  | 0 | 0 | CFT073           | DQ389047,<br>DQ441067,<br>DQ441068                                                                                                                                                                          |
| icd_15 | 3  | 1  | 0 | 2 | -                | DQ389048,<br>DQ440980,<br>DQ440981,<br>DQ440982,<br>DQ440983,<br>DQ440984,<br>DQ440985,<br>DQ440986,<br>DQ440987,<br>DQ440988,<br>DQ440989,<br>DQ440990                                                     |
| mdh_1  | 12 | 10 | 2 | 0 | -                | DQ389049,<br>DQ440991                                                                                                                                                                                       |
| mdh_2  | 0  | 0  | 0 | 0 | Shigella 2T, 301 | DQ389050,<br>DQ440992,<br>DQ440993,<br>DQ440994                                                                                                                                                             |
| mdh_3  | 4  | 1  | 1 | 2 | -                | DQ389051,<br>DQ440995                                                                                                                                                                                       |
| mdh_4  | 0  | 0  | 0 | 0 | EDL933, SAKAI    | DQ389052                                                                                                                                                                                                    |
| mdh_5  | 1  | 1  | 0 | 0 | -                | DQ389053                                                                                                                                                                                                    |
| mdh_6  | 0  | 0  | 0 | 0 | K12              | DQ389054,<br>DQ440996,<br>DQ440997,<br>DQ440998,<br>DQ440999,<br>DQ441000,<br>DQ441001,<br>DQ441002,<br>DQ441003,<br>DQ441004,<br>DQ441005,<br>DQ441006,<br>DQ441007,<br>DQ441008,<br>DQ441009,<br>DQ441010 |
| mdh_7  | 24 | 21 | 2 | 1 | UTI89, CFT073    |                                                                                                                                                                                                             |

|               |          |          |          |          |          |                                                                                                                                                                                               |
|---------------|----------|----------|----------|----------|----------|-----------------------------------------------------------------------------------------------------------------------------------------------------------------------------------------------|
|               |          |          |          |          |          | DQ441011,<br>DQ441012,<br>DQ441013,<br>DQ441014,<br>DQ441015,<br>DQ441016,<br>DQ441017,<br>DQ441018,<br>DQ441019,<br>DQ441020<br>DQ389055,<br>DQ441021,<br>DQ441022,<br>DQ441023,<br>DQ441024 |
| <b>mdh_8</b>  | <b>5</b> | <b>3</b> | <b>2</b> | <b>0</b> | <b>-</b> | DQ389056,<br>DQ441025<br>DQ389057,<br>DQ441026                                                                                                                                                |
| <b>mdh_9</b>  | <b>2</b> | <b>1</b> | <b>0</b> | <b>1</b> | <b>-</b> |                                                                                                                                                                                               |
| <b>mdh_10</b> | <b>2</b> | <b>2</b> | <b>0</b> | <b>0</b> | <b>-</b> |                                                                                                                                                                                               |

Allele names are colored as in Fig. 2; red indicates strains included in foreground branches where positive selection is detected. Allele sequences for *amiA*, *fepE*, *ompC*, *adk*, *icd*, and *mdh* are deposited in GenBank with the indicated accession nos.
