# Supplementary material
Source: PubMed Central journal article supplement (PMC1458683)
Supplement: pnas_0600938103_3.pdf [file pnas_0600938103_3.pdf]

**Table 5. Unique genes in the UTI89 genome**

| <u>Cutoff,<br/>%</u> | <u>Database</u> | <u>Unique genes in UTI89 (%)</u> |                |
|----------------------|-----------------|----------------------------------|----------------|
|                      |                 | <u>Chromosome</u>                | <u>Plasmid</u> |
| 50                   | nr              | 134 (2.65%)                      | 2 (1.38%)      |
|                      | <i>E. coli</i>  | 351 (6.93%)                      | 102 (70.3%)    |
| 80                   | nr              | 239 (4.72%)                      | 10 (6.90%)     |
|                      | <i>E. coli</i>  | 477 (9.42%)                      | 112 (77.2%)    |

Protein sequences encoded by genes from the UTI89 chromosome and plasmid were compared with the GenBank nr database or the predicted proteins from the six published *E. coli* genomes (including two *Shigella* genomes) by using BLASTP. For each UTI89 protein, only the best BLASTP hit (based on E-value) was used. A gene was counted as “unique” at a certain percentage cutoff if (i) the alignment length (reported by BLASTP) divided by the length of the UTI89 protein sequence was less than the cutoff; or (ii) the percent identity (reported by BLASTP) was less than the cutoff. The number of unique genes at cutoffs of 50% and 80% is shown.
