# Supplementary material
Source: PubMed Central journal article supplement (PMC1458683)
Supplement: pnas_0600938103_4.pdf [file pnas_0600938103_4.pdf]

**Table 6. Distribution of chaperone-usher pilus operons in sequenced *E. coli* genomes**

|                  | K12    | UPEC  |        | EHEC   |       |
|------------------|--------|-------|--------|--------|-------|
|                  | MG1655 | UTI89 | CFT073 | EDL933 | SAKAI |
| <i>fim</i>       | +      | +     | +      | ±      | ±     |
| <i>pap</i>       | -      | +     | +*     | -      | -     |
| F17-like         | -      | +     | -      | -      | -     |
| <i>sfa</i>       | -      | +     | -      | -      | -     |
| <i>yad</i>       | +      | +     | +      | +      | +     |
| <i>auf</i>       | -      | ±     | +      | -      | -     |
| <i>yfc</i>       | +      | +     | +      | +      | +     |
| <i>yqi</i>       | +      | +     | +      | -      | -     |
| <i>yeh</i>       | +      | +     | +      | +      | +     |
| <i>fml</i>       | ±      | ±     | +      | +      | +     |
| <i>foc</i>       | -      | -     | +      | -      | -     |
| <i>ycb</i>       | +      | -     | -      | ±      | ±     |
| <i>sfm</i>       | +      | -     | -      | +      | +     |
| <i>lpf</i>       | -      | -     | -      | +      | +     |
| <i>yra</i>       | +      | -     | -      | +      | +     |
| EHEC-pilus       | -      | -     | -      | +      | +     |
| <i>ybg</i>       | +      | -     | -      | +      | +     |
| <i>stc</i> -like | -      | -     | -      | +      | +     |
| <i>lpf2</i>      | -      | -     | -      | +      | +     |

“+” indicates presence, “-“ indicates absence, and “±” indicates that an operon is present but likely nonfunctional due to mutation or deletion of genes in the operon. An asterisk (\*) indicates that two copies of the operon are present in the genome.
